# Supplementary material for: Synthetic and mechanistic inputs of photochemistry into the bis-acetylacetonatocobalt-mediated radical polymerization of n-butyl acrylate and vinyl acetate
Source: Royal Society of Chemistry journal article supplement (doi:10.1039/c1py00443c), 2011-11-28
Supplement: c1py00443c.pdf [file c1py00443c.pdf]

## Supporting Information

### Synthetic and mechanistic inputs of photochemistry into the bis-acetylacetonatocobalt-mediated radical polymerization of n-butyl acrylate and vinyl acetate

Christophe Detrembleur,\* Davy-Louis Versace, Yasmine Piette, Marie Hurtgen, Christine Jérôme, Jacques Lalevée\* and Antoine Debuigne

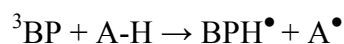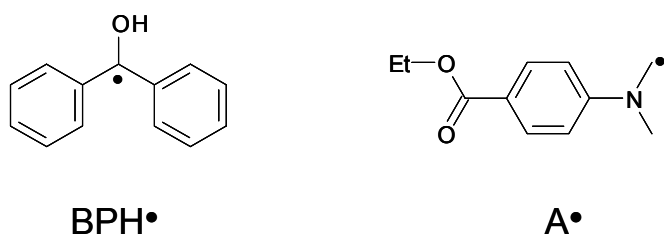

**Scheme S1:** Photogeneration of ketyl radical by photolysis of the benzophenone triplet state (<sup>3</sup>BP) with ethyldimethylaminobenzoate (A-H).

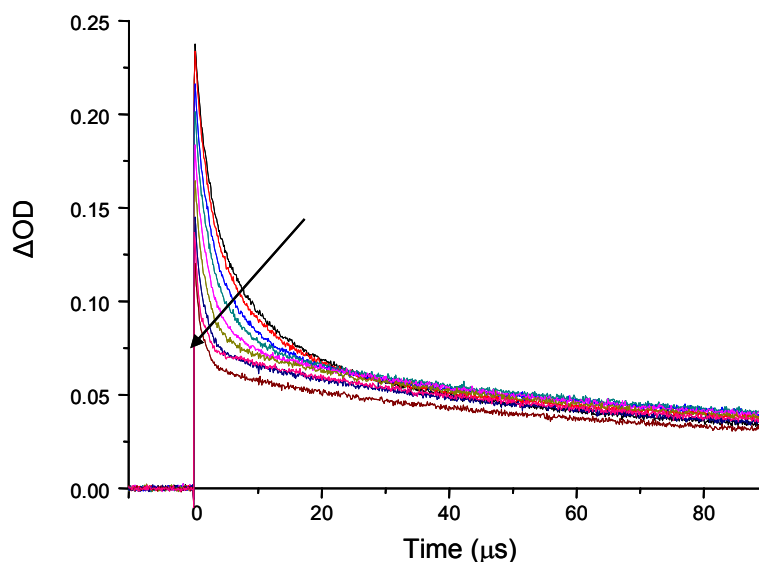

**Figure S1.** Kinetics for the benzophenone ketyl radical at 545 nm upon addition of various amounts of  $\text{Co}(\text{acac})_2$  in acetonitrile. The ketyl radical is generated by the interaction of benzophenone triplet state and ethyldimethylaminobenzoate.

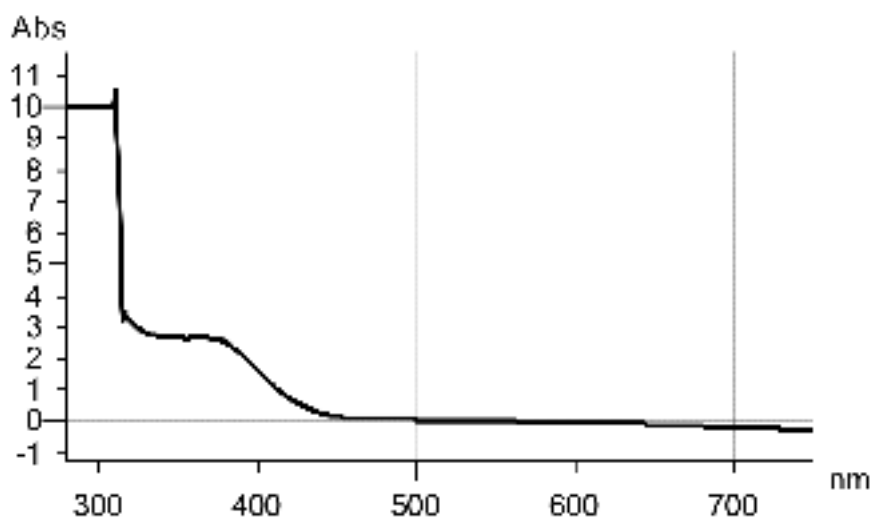

**Figure S2.** UV/vis spectrum for alkyl-cobalt(III) $\#(R_0-(CH_2-CHOAc)_{<4}-Co(acac)_2$ ;  $R_0$  = primary radical from the decomposition of V-70) in degassed  $CH_2Cl_2$ .
